# Supplementary material for: Molecular Detection of Southern Tomato Amalgavirus Prevalent in Tomatoes and Its Genomic Characterization with Global Evolutionary Dynamics
Source: MDPI journal article supplement (doi:10.3390/v14112481), 2022-11-09
Supplement: s1 [file s1]

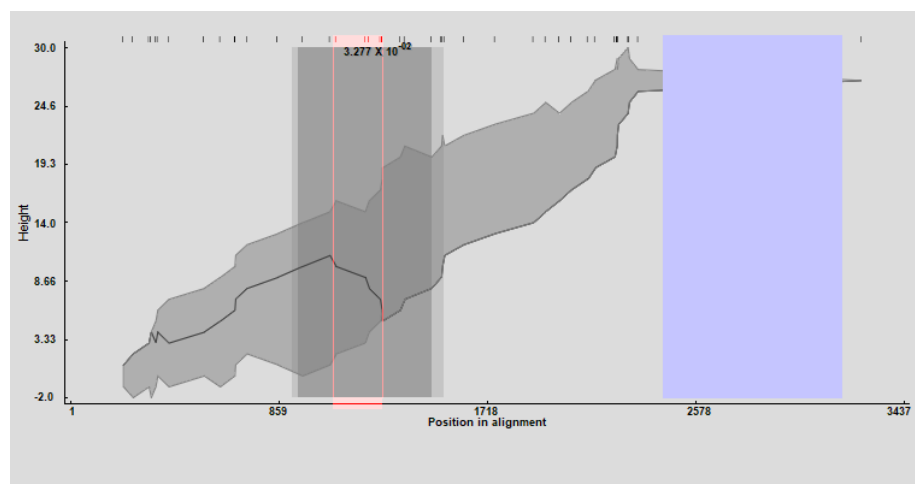

**Figure S1.** The second recombination event detected among 38 full-length genomic sequences of STV.

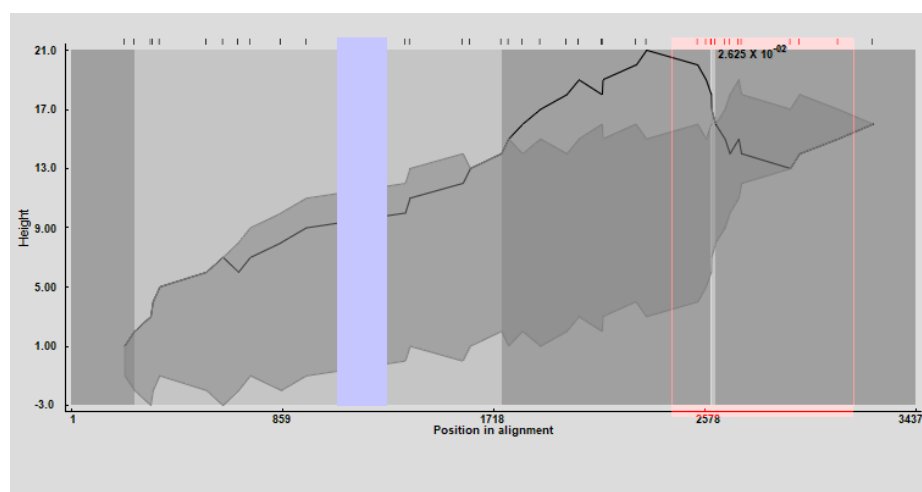

**Figure S2.** The third recombination event detected in 03 full-length sequences of STV.

**Table S1.** Tomato samples collected from different regions of China and Pakistan were employed in this study for the detection of STV and confirmation of its infection dynamics under single and mixed infection conditions with its variable rates of infections.

| Sample locality | GPS (Latitude, Longitude) | Sample designation | Type of sample (Production) | Symptoms                                                          | Suspected viral infections | Rate of ToYSD infection (%) <sup>1</sup> |                               | Detection and confirmation of STV |                   | Confirmed rate of STV infection (%) <sup>1</sup> | Percentage of STV single infection | Percentage of STV mixed infection in different combinations of viruses |           |                |                     |                     |
|-----------------|---------------------------|--------------------|-----------------------------|-------------------------------------------------------------------|----------------------------|------------------------------------------|-------------------------------|-----------------------------------|-------------------|--------------------------------------------------|------------------------------------|------------------------------------------------------------------------|-----------|----------------|---------------------|---------------------|
|                 |                           |                    |                             |                                                                   |                            | ToYSD Incidence <sup>a</sup>             | ToYSD Prevalence <sup>b</sup> | RT-PCR                            | Sanger            |                                                  |                                    | STV                                                                    | STV+TYLCV | STV+TYLCV+ToCV | STV+TYLCV+ToCV+TSWV | STV+TYLCV+ToCV+ToMV |
| Beijing, China  | Fangshan                  | FS-08122017-1      | Leaf (Greenhouse 1)         | Typical yellowing, leaf curling, mild crinkling, and deformations | TYLCV, STV, ToCV           | 75.00                                    | 80.00                         | STV, TY-LCV                       | STV, TY-LCV       | 58.33                                            | 25.00                              | 16.66                                                                  | 08.33     | 00.00          | 08.33               |                     |
|                 |                           | FS-08122017-2      |                             | Leaf yellowing, chlorosis, mild crinkling, and                    | TYLCV, STV, ToCV, TICV     |                                          |                               | TY-LCV, STV, ToCV                 | TY-LCV, STV, ToCV |                                                  |                                    |                                                                        |           |                |                     |                     |

[illegible]

[illegible]

|                       |                                           |                                        |                                                                   |                                                           |                                                         |                                                |
|-----------------------|-------------------------------------------|----------------------------------------|-------------------------------------------------------------------|-----------------------------------------------------------|---------------------------------------------------------|------------------------------------------------|
|                       |                                           |                                        |                                                                   | ToMV,<br>PVY                                              |                                                         |                                                |
| TZ-<br>12042018<br>-3 |                                           |                                        | Typical yellowing, necrotic patches, and dark green leaves        | TYLCV,<br>STV,<br>ToCV,<br>TSWV,<br>CMV,<br>ToMV,<br>TICV | STV,<br>ToCV,<br>TSWV,<br>TY-<br>LCV,<br>ToMV,<br>TICV* | STV,<br>TSWV,<br>TY-<br>LCV,<br>ToMV,<br>TICV* |
| TZ-<br>12042018<br>-4 |                                           |                                        | Leaf yellowing, deformed, and reduce fruit size                   | TYLCV,<br>STV,<br>ToCV                                    | STV                                                     | STV                                            |
| TZ-<br>12042018<br>-5 | Leaf<br>(Green-house 2)                   |                                        | Leaf chlorosis, yellowing, mosaic, and mottling                   | TYLCV,<br>STV,<br>ToCV                                    | STV,<br>TY-<br>LCV,<br>ToCV                             | STV,<br>TY-<br>LCV,<br>ToCV                    |
| TZ-<br>12042018<br>-6 |                                           |                                        | No obvious symptoms look healthy sample                           | STV                                                       | STV                                                     | STV                                            |
| TZ-<br>12042018<br>-7 |                                           |                                        | Stunted plant growth having alternate patches on leaves           | STV,<br>ToMV,<br>CMV                                      | STV                                                     | STV                                            |
| TZ-<br>12042018<br>-1 |                                           |                                        | Leaf yellowing, crinkling, deformation                            | STV,<br>ToMV,<br>ToCV,<br>TYLCV,<br>TICV                  | STV,<br>ToCV,<br>TY-<br>LCV                             | STV,<br>ToCV,<br>TY-<br>LCV                    |
| TZ-<br>12042018<br>-2 |                                           |                                        | Leaf chlorosis, mosaic, and mottling                              | TYLCV,<br>ToCV,<br>CMV,<br>ToMV,<br>PVY                   | -                                                       | -                                              |
| TZ-<br>12042018<br>-3 | Leaf<br>(Green-house 3)                   |                                        | Leaf chlorosis and deformation                                    | TYLCV,<br>STV,<br>ToCV,<br>CMV,<br>ToMV                   | STV                                                     | STV                                            |
| TZ-<br>12042018<br>-4 |                                           |                                        | Leaf yellowing, chlorosis, mild crinkling, and fruit deformations | TYLCV,<br>STV,<br>ToCV,<br>TICV                           | STV,<br>TY-<br>LCV,<br>ToCV                             | STV,<br>TY-<br>LCV,<br>ToCV                    |
| TZ-<br>12042018<br>-5 |                                           |                                        | Mild crinkling, and fruit deformations                            | TYLCV,<br>ToCV,<br>ToMV,<br>CMV                           | -                                                       | -                                              |
| TZ-<br>18122019<br>-1 |                                           |                                        |                                                                   | TYLCV                                                     | -                                                       | -                                              |
| TZ-<br>18122019<br>-2 | Seed, F1<br>generation<br>(Seed source 1) | Directly obtained from the seed source |                                                                   | TYLCV,<br>STV                                             | STV,<br>TY-<br>LCV                                      | STV,<br>TY-<br>LCV                             |
| TZ-<br>18122019<br>-3 |                                           |                                        |                                                                   | STV,<br>TYLCV                                             | STV                                                     | STV                                            |
| TZ-<br>18122019<br>-4 |                                           |                                        |                                                                   | TYLCV                                                     | TY-<br>LCV                                              | TY-<br>LCV                                     |

|  |  |  |  |  |  |  |  |  |  |  |  |  |  |  |  |  |  |  |  |  |  |  |  |  |  |  |  |  |  |  |  |  |  |  |  |  |  |  |  |  |  |  |  |  |  |  |  |  |  |  |  |  |  |  |  |  |  |  |  |  |  |  |  |  |  |  |  |  |  |  |  |  |  |  |  |  |  |  |  |  |  |  |  |  |  |  |  |  |  |  |  |  |  |  |  |  |  |  |  |  |  |  |  |  |  |  |  |  |  |  |  |  |  |  |  |  |  |  |  |  |  |  |  |  |  |  |  |  |  |  |  |  |  |  |  |  |  |  |  |  |  |  |  |  |  |  |  |  |  |  |  |  |  |  |  |  |  |  |  |  |  |  |  |  |  |  |  |  |  |  |  |  |  |  |  |  |  |  |  |  |  |  |  |  |  |  |  |  |  |  |  |  |  |  |  |  |  |  |  |  |  |  |  |  |  |  |  |  |  |  |  |  |  |  |  |  |  |  |  |  |  |  |  |  |  |  |  |  |  |  |  |  |  |  |  |  |  |  |  |  |  |  |  |  |  |  |  |  |  |  |  |  |  |  |  |  |  |  |  |  |  |  |  |  |  |  |  |  |  |  |  |  |  |  |  |  |  |  |  |  |  |  |  |  |  |  |  |  |  |  |  |  |  |  |  |  |  |  |  |  |  |  |  |  |  |  |  |  |  |  |  |  |  |  |  |  |  |  |  |  |  |  |  |  |  |  |  |  |  |  |  |  |  |  |  |  |  |  |  |  |  |  |  |  |  |  |  |  |  |  |  |  |  |  |  |  |  |  |  |  |  |  |  |  |  |  |  |  |  |  |  |  |  |  |  |  |  |  |  |  |  |  |  |  |  |  |  |  |  |  |  |  |  |  |  |  |  |  |  |  |  |  |  |  |  |  |  |  |  |  |  |  |  |  |  |  |  |  |  |  |  |  |  |  |  |  |  |  |  |  |  |  |  |  |  |  |  |  |  |  |  |  |  |  |  |  |  |  |  |  |  |  |  |  |  |  |  |  |  |  |  |  |  |  |  |  |  |  |  |  |  |  |  |  |  |  |  |  |  |  |  |  |  |  |  |  |  |  |  |  |  |  |  |  |  |  |  |  |  |  |  |  |  |  |  |  |  |  |  |  |  |  |  |  |  |  |  |  |  |  |  |  |  |  |  |  |  |  |  |  |  |  |  |  |  |  |  |  |  |  |  |  |  |  |  |  |  |  |  |  |  |  |  |  |  |  |  |  |  |  |  |  |  |  |  |  |  |  |  |  |  |  |  |  |  |  |  |  |  |  |  |  |  |  |  |  |  |  |  |  |  |  |  |  |  |  |  |  |  |  |  |  |  |  |  |  |  |  |  |  |  |  |  |  |  |  |  |  |  |  |  |  |  |  |  |  |  |  |  |  |  |  |  |  |  |  |  |  |  |  |  |  |  |  |  |  |  |  |  |  |  |  |  |  |  |  |  |  |  |  |  |  |  |  |  |  |  |  |  |  |  |  |  |  |  |  |  |  |  |  |  |  |  |  |  |  |  |  |  |  |  |  |  |  |  |  |  |  |  |  |  |  |  |  |  |  |  |  |  |  |  |  |  |  |  |  |  |  |  |  |  |  |  |  |  |  |  |  |  |  |  |  |  |  |  |  |  |  |  |  |  |  |  |  |  |  |  |  |  |  |  |  |  |  |  |  |  |  |  |  |  |  |  |  |  |  |  |  |  |  |  |  |  |  |  |  |  |  |  |  |  |  |  |  |  |  |  |  |  |  |  |  |  |  |  |  |  |  |  |  |  |  |  |  |  |  |  |  |  |  |  |  |  |  |  |  |  |  |  |  |  |  |  |  |  |  |  |  |  |  |  |  |  |  |  |  |  |  |  |  |  |  |  |  |  |  |  |  |  |  |  |  |  |  |  |  |  |  |  |  |  |  |  |  |  |  |  |  |  |  |  |  |  |  |  |  |  |  |  |  |  |  |  |  |  |  |  |  |  |  |  |  |  |  |  |  |  |  |  |  |  |  |  |  |  |  |  |  |  |  |  |  |  |  |  |  |  |  |  |  |  |  |  |  |  |  |  |  |  |  |  |  |  |  |  |  |  |  |  |  |  |  |  |  |  |  |  |  |  |  |  |  |  |  |  |  |  |  |  |  |  |  |  |  |  |  |  |  |  |  |  |  |  |  |  |  |  |  |  |  |  |  |  |  |  |  |  |  |  |  |  |  |  |  |  |  |  |  |  |  |  |  |  |  |  |  |  |  |  |  |  |  |  |  |  |  |  |  |  |  |  |  |  |  |  |  |  |  |  |  |  |  |  |  |  |  |  |  |  |  |  |  |  |  |  |  |  |  |  |  |  |  |  |  |  |  |  |  |  |  |  |  |  |  |  |  |  |  |  |  |  |  |  |  |  |  |  |  |  |  |  |  |  |  |  |  |  |  |  |  |  |  |  |  |  |  |  |  |  |  |  |  |  |  |  |  |  |  |  |  |  |  |  |  |  |  |  |  |  |  |  |  |  |  |  |  |  |  |  |  |  |  |  |  |  |  |  |  |  |  |  |  |  |  |  |  |  |  |  |  |  |  |  |  |  |  |  |  |  |  |  |  |  |  |  |  |  |  |  |  |  |  |  |  |  |  |  |  |  |  |  |  |  |  |  |  |  |  |  |  |  |  |  |  |  |  |  |  |  |  |  |  |  |  |  |  |  |  |  |  |  |  |  |  |  |  |  |  |  |  |  |  |  |  |  |  |  |  |  |  |  |  |  |  |  |  |  |  |  |  |  |  |  |  |  |  |  |  |  |  |  |  |  |  |  |  |  |  |  |  |  |  |  |  |  |  |  |  |  |  |  |  |  |  |  |  |  |  |  |  |  |  |  |  |  |  |  |  |  |  |  |  |  |  |  |  |  |  |  |  |  |  |  |  |  |  |  |  |  |  |  |  |  |  |  |  |  |  |  |  |  |  |  |  |  |  |  |  |  |  |  |  |  |  |  |  |  |  |  |  |  |  |  |  |  |  |  |  |  |  |  |  |  |  |  |  |  |  |  |  |  |  |  |  |  |  |  |  |  |  |  |  |  |  |  |  |  |  |  |  |  |  |  |  |  |  |  |  |  |  |  |  |  |  |  |  |  |  |  |  |  |  |  |  |  |  |  |  |  |  |  |  |  |  |  |  |  |  |  |  |  |  |  |  |  |  |  |  |  |  |  |
|--|--|--|--|--|--|--|--|--|--|--|--|--|--|--|--|--|--|--|--|--|--|--|--|--|--|--|--|--|--|--|--|--|--|--|--|--|--|--|--|--|--|--|--|--|--|--|--|--|--|--|--|--|--|--|--|--|--|--|--|--|--|--|--|--|--|--|--|--|--|--|--|--|--|--|--|--|--|--|--|--|--|--|--|--|--|--|--|--|--|--|--|--|--|--|--|--|--|--|--|--|--|--|--|--|--|--|--|--|--|--|--|--|--|--|--|--|--|--|--|--|--|--|--|--|--|--|--|--|--|--|--|--|--|--|--|--|--|--|--|--|--|--|--|--|--|--|--|--|--|--|--|--|--|--|--|--|--|--|--|--|--|--|--|--|--|--|--|--|--|--|--|--|--|--|--|--|--|--|--|--|--|--|--|--|--|--|--|--|--|--|--|--|--|--|--|--|--|--|--|--|--|--|--|--|--|--|--|--|--|--|--|--|--|--|--|--|--|--|--|--|--|--|--|--|--|--|--|--|--|--|--|--|--|--|--|--|--|--|--|--|--|--|--|--|--|--|--|--|--|--|--|--|--|--|--|--|--|--|--|--|--|--|--|--|--|--|--|--|--|--|--|--|--|--|--|--|--|--|--|--|--|--|--|--|--|--|--|--|--|--|--|--|--|--|--|--|--|--|--|--|--|--|--|--|--|--|--|--|--|--|--|--|--|--|--|--|--|--|--|--|--|--|--|--|--|--|--|--|--|--|--|--|--|--|--|--|--|--|--|--|--|--|--|--|--|--|--|--|--|--|--|--|--|--|--|--|--|--|--|--|--|--|--|--|--|--|--|--|--|--|--|--|--|--|--|--|--|--|--|--|--|--|--|--|--|--|--|--|--|--|--|--|--|--|--|--|--|--|--|--|--|--|--|--|--|--|--|--|--|--|--|--|--|--|--|--|--|--|--|--|--|--|--|--|--|--|--|--|--|--|--|--|--|--|--|--|--|--|--|--|--|--|--|--|--|--|--|--|--|--|--|--|--|--|--|--|--|--|--|--|--|--|--|--|--|--|--|--|--|--|--|--|--|--|--|--|--|--|--|--|--|--|--|--|--|--|--|--|--|--|--|--|--|--|--|--|--|--|--|--|--|--|--|--|--|--|--|--|--|--|--|--|--|--|--|--|--|--|--|--|--|--|--|--|--|--|--|--|--|--|--|--|--|--|--|--|--|--|--|--|--|--|--|--|--|--|--|--|--|--|--|--|--|--|--|--|--|--|--|--|--|--|--|--|--|--|--|--|--|--|--|--|--|--|--|--|--|--|--|--|--|--|--|--|--|--|--|--|--|--|--|--|--|--|--|--|--|--|--|--|--|--|--|--|--|--|--|--|--|--|--|--|--|--|--|--|--|--|--|--|--|--|--|--|--|--|--|--|--|--|--|--|--|--|--|--|--|--|--|--|--|--|--|--|--|--|--|--|--|--|--|--|--|--|--|--|--|--|--|--|--|--|--|--|--|--|--|--|--|--|--|--|--|--|--|--|--|--|--|--|--|--|--|--|--|--|--|--|--|--|--|--|--|--|--|--|--|--|--|--|--|--|--|--|--|--|--|--|--|--|--|--|--|--|--|--|--|--|--|--|--|--|--|--|--|--|--|--|--|--|--|--|--|--|--|--|--|--|--|--|--|--|--|--|--|--|--|--|--|--|--|--|--|--|--|--|--|--|--|--|--|--|--|--|--|--|--|--|--|--|--|--|--|--|--|--|--|--|--|--|--|--|--|--|--|--|--|--|--|--|--|--|--|--|--|--|--|--|--|--|--|--|--|--|--|--|--|--|--|--|--|--|--|--|--|--|--|--|--|--|--|--|--|--|--|--|--|--|--|--|--|--|--|--|--|--|--|--|--|--|--|--|--|--|--|--|--|--|--|--|--|--|--|--|--|--|--|--|--|--|--|--|--|--|--|--|--|--|--|--|--|--|--|--|--|--|--|--|--|--|--|--|--|--|--|--|--|--|--|--|--|--|--|--|--|--|--|--|--|--|--|--|--|--|--|--|--|--|--|--|--|--|--|--|--|--|--|--|--|--|--|--|--|--|--|--|--|--|--|--|--|--|--|--|--|--|--|--|--|--|--|--|--|--|--|--|--|--|--|--|--|--|--|--|--|--|--|--|--|--|--|--|--|--|--|--|--|--|--|--|--|--|--|--|--|--|--|--|--|--|--|--|--|--|--|--|--|--|--|--|--|--|--|--|--|--|--|--|--|--|--|--|--|--|--|--|--|--|--|--|--|--|--|--|--|--|--|--|--|--|--|--|--|--|--|--|--|--|--|--|--|--|--|--|--|--|--|--|--|--|--|--|--|--|--|--|--|--|--|--|--|--|--|--|--|--|--|--|--|--|--|--|--|--|--|--|--|--|--|--|--|--|--|--|--|--|--|--|--|--|--|--|--|--|--|--|--|--|--|--|--|--|--|--|--|--|--|--|--|--|--|--|--|--|--|--|--|--|--|--|--|--|--|--|--|--|--|--|--|--|--|--|--|--|--|--|--|--|--|--|--|--|--|--|--|--|--|--|--|--|--|--|--|--|--|--|--|--|--|--|--|--|--|--|--|--|--|--|--|--|--|--|--|--|--|--|--|--|--|--|--|--|--|--|--|--|--|--|--|--|--|--|--|--|--|--|--|--|--|--|--|--|--|--|--|--|--|--|--|--|--|--|--|--|--|--|--|--|--|--|--|--|--|--|--|--|--|--|--|--|--|--|--|--|--|--|--|--|--|--|--|--|--|--|--|--|--|--|--|--|--|--|--|--|--|--|--|--|--|--|--|--|--|--|--|--|--|--|--|--|--|--|--|--|--|--|--|--|--|--|--|--|--|--|--|--|--|--|--|--|--|--|--|--|--|--|--|--|--|--|--|--|--|--|--|--|--|--|--|--|--|--|--|--|--|--|--|--|--|--|--|--|--|--|--|--|--|--|--|--|--|--|--|--|--|--|--|--|--|--|--|--|--|--|--|--|--|--|--|--|--|--|--|--|--|--|--|--|--|--|--|--|--|--|--|--|--|--|--|--|--|--|--|--|--|--|--|--|--|--|--|--|--|--|--|--|--|--|--|--|--|--|--|--|--|--|--|--|--|--|--|--|--|--|--|--|--|--|--|--|--|--|--|--|--|--|--|--|--|--|--|--|--|--|--|--|--|--|--|--|--|--|--|--|--|--|--|--|--|--|--|
|  |  |  |  |  |  |  |  |  |  |  |  |  |  |  |  |  |  |  |  |  |  |  |  |  |  |  |  |  |  |  |  |  |  |  |  |  |  |  |  |  |  |  |  |  |  |  |  |  |  |  |  |  |  |  |  |  |  |  |  |  |  |  |  |  |  |  |  |  |  |  |  |  |  |  |  |  |  |  |  |  |  |  |  |  |  |  |  |  |  |  |  |  |  |  |  |  |  |  |  |  |  |  |  |  |  |  |  |  |  |  |  |  |  |  |  |  |  |  |  |  |  |  |  |  |  |  |  |  |  |  |  |  |  |  |  |  |  |  |  |  |  |  |  |  |  |  |  |  |  |  |  |  |  |  |  |  |  |  |  |  |  |  |  |  |  |  |  |  |  |  |  |  |  |  |  |  |  |  |  |  |  |  |  |  |  |  |  |  |  |  |  |  |  |  |  |  |  |  |  |  |  |  |  |  |  |  |  |  |  |  |  |  |  |  |  |  |  |  |  |  |  |  |  |  |  |  |  |  |  |  |  |  |  |  |  |  |  |  |  |  |  |  |  |  |  |  |  |  |  |  |  |  |  |  |  |  |  |  |  |  |  |  |  |  |  |  |  |  |  |  |  |  |  |  |  |  |  |  |  |  |  |  |  |  |  |  |  |  |  |  |  |  |  |  |  |  |  |  |  |  |  |  |  |  |  |  |  |  |  |  |  |  |  |  |  |  |  |  |  |  |  |  |  |  |  |  |  |  |  |  |  |  |  |  |  |  |  |  |  |  |  |  |  |  |  |  |  |  |  |  |  |  |  |  |  |  |  |  |  |  |  |  |  |  |  |  |  |  |  |  |  |  |  |  |  |  |  |  |  |  |  |  |  |  |  |  |  |  |  |  |  |  |  |  |  |  |  |  |  |  |  |  |  |  |  |  |  |  |  |  |  |  |  |  |  |  |  |  |  |  |  |  |  |  |  |  |  |  |  |  |  |  |  |  |  |  |  |  |  |  |  |  |  |  |  |  |  |  |  |  |  |  |  |  |  |  |  |  |  |  |  |  |  |  |  |  |  |  |  |  |  |  |  |  |  |  |  |  |  |  |  |  |  |  |  |  |  |  |  |  |  |  |  |  |  |  |  |  |  |  |  |  |  |  |  |  |  |  |  |  |  |  |  |  |  |  |  |  |  |  |  |  |  |  |  |  |  |  |  |  |  |  |  |  |  |  |  |  |  |  |  |  |  |  |  |  |  |  |  |  |  |  |  |  |  |  |  |  |  |  |  |  |  |  |  |  |  |  |  |  |  |  |  |  |  |  |  |  |  |  |  |  |  |  |  |  |  |  |  |  |  |  |  |  |  |  |  |  |  |  |  |  |  |  |  |  |  |  |  |  |  |  |  |  |  |  |  |  |  |  |  |  |  |  |  |  |  |  |  |  |  |  |  |  |  |  |  |  |  |  |  |  |  |  |  |  |  |  |  |  |  |  |  |  |  |  |  |  |  |  |  |  |  |  |  |  |  |  |  |  |  |  |  |  |  |  |  |  |  |  |  |  |  |  |  |  |  |  |  |  |  |  |  |  |  |  |  |  |  |  |  |  |  |  |  |  |  |  |  |  |  |  |  |  |  |  |  |  |  |  |  |  |  |  |  |  |  |  |  |  |  |  |  |  |  |  |  |  |  |  |  |  |  |  |  |  |  |  |  |  |  |  |  |  |  |  |  |  |  |  |  |  |  |  |  |  |  |  |  |  |  |  |  |  |  |  |  |  |  |  |  |  |  |  |  |  |  |  |  |  |  |  |  |  |  |  |  |  |  |  |  |  |  |  |  |  |  |  |  |  |  |  |  |  |  |  |  |  |  |  |  |  |  |  |  |  |  |  |  |  |  |  |  |  |  |  |  |  |  |  |  |  |  |  |  |  |  |  |  |  |  |  |  |  |  |  |  |  |  |  |  |  |  |  |  |  |  |  |  |  |  |  |  |  |  |  |  |  |  |  |  |  |  |  |  |  |  |  |  |  |  |  |  |  |  |  |  |  |  |  |  |  |  |  |  |  |  |  |  |  |  |  |  |  |  |  |  |  |  |  |  |  |  |  |  |  |  |  |  |  |  |  |  |  |  |  |  |  |  |  |  |  |  |  |  |  |  |  |  |  |  |  |  |  |  |  |  |  |  |  |  |  |  |  |  |  |  |  |  |  |  |  |  |  |  |  |  |  |  |  |  |  |  |  |  |  |  |  |  |  |  |  |  |  |  |  |  |  |  |  |  |  |  |  |  |  |  |  |  |  |  |  |  |  |  |  |  |  |  |  |  |  |  |  |  |  |  |  |  |  |  |  |  |  |  |  |  |  |  |  |  |  |  |  |  |  |  |  |  |  |  |  |  |  |  |  |  |  |  |  |  |  |  |  |  |  |  |  |  |  |  |  |  |  |  |  |  |  |  |  |  |  |  |  |  |  |  |  |  |  |  |  |  |  |  |  |  |  |  |  |  |  |  |  |  |  |  |  |  |  |  |  |  |  |  |  |  |  |  |  |  |  |  |  |  |  |  |  |  |  |  |  |  |  |  |  |  |  |  |  |  |  |  |  |  |  |  |  |  |  |  |  |  |  |  |  |  |  |  |  |  |  |  |  |  |  |  |  |  |  |  |  |  |  |  |  |  |  |  |  |  |  |  |  |  |  |  |  |  |  |  |  |  |  |  |  |  |  |  |  |  |  |  |  |  |  |  |  |  |  |  |  |  |  |  |  |  |  |  |  |  |  |  |  |  |  |  |  |  |  |  |  |  |  |  |  |  |  |  |  |  |  |  |  |  |  |  |  |  |  |  |  |  |  |  |  |  |  |  |  |  |  |  |  |  |  |  |  |  |  |  |  |  |  |  |  |  |  |  |  |  |  |  |  |  |  |  |  |  |  |  |  |  |  |  |  |  |  |  |  |  |  |  |  |  |  |  |  |  |  |  |  |  |  |  |  |  |  |  |  |  |  |  |  |  |  |  |  |  |  |  |  |  |  |  |  |  |  |  |  |  |  |  |  |  |  |  |  |  |  |  |  |  |  |  |  |  |  |  |  |  |  |  |  |  |  |  |  |  |  |  |  |  |  |  |  |  |  |  |  |  |  |  |  |  |  |  |  |  |  |  |  |  |  |  |  |  |  |  |  |  |  |  |  |  |  |  |  |  |  |  |  |  |  |  |  |  |  |  |  |  |  |  |  |  |  |  |  |  |  |  |
|--|--|--|--|--|--|--|--|--|--|--|--|--|--|--|--|--|--|--|--|--|--|--|--|--|--|--|--|--|--|--|--|--|--|--|--|--|--|--|--|--|--|--|--|--|--|--|--|--|--|--|--|--|--|--|--|--|--|--|--|--|--|--|--|--|--|--|--|--|--|--|--|--|--|--|--|--|--|--|--|--|--|--|--|--|--|--|--|--|--|--|--|--|--|--|--|--|--|--|--|--|--|--|--|--|--|--|--|--|--|--|--|--|--|--|--|--|--|--|--|--|--|--|--|--|--|--|--|--|--|--|--|--|--|--|--|--|--|--|--|--|--|--|--|--|--|--|--|--|--|--|--|--|--|--|--|--|--|--|--|--|--|--|--|--|--|--|--|--|--|--|--|--|--|--|--|--|--|--|--|--|--|--|--|--|--|--|--|--|--|--|--|--|--|--|--|--|--|--|--|--|--|--|--|--|--|--|--|--|--|--|--|--|--|--|--|--|--|--|--|--|--|--|--|--|--|--|--|--|--|--|--|--|--|--|--|--|--|--|--|--|--|--|--|--|--|--|--|--|--|--|--|--|--|--|--|--|--|--|--|--|--|--|--|--|--|--|--|--|--|--|--|--|--|--|--|--|--|--|--|--|--|--|--|--|--|--|--|--|--|--|--|--|--|--|--|--|--|--|--|--|--|--|--|--|--|--|--|--|--|--|--|--|--|--|--|--|--|--|--|--|--|--|--|--|--|--|--|--|--|--|--|--|--|--|--|--|--|--|--|--|--|--|--|--|--|--|--|--|--|--|--|--|--|--|--|--|--|--|--|--|--|--|--|--|--|--|--|--|--|--|--|--|--|--|--|--|--|--|--|--|--|--|--|--|--|--|--|--|--|--|--|--|--|--|--|--|--|--|--|--|--|--|--|--|--|--|--|--|--|--|--|--|--|--|--|--|--|--|--|--|--|--|--|--|--|--|--|--|--|--|--|--|--|--|--|--|--|--|--|--|--|--|--|--|--|--|--|--|--|--|--|--|--|--|--|--|--|--|--|--|--|--|--|--|--|--|--|--|--|--|--|--|--|--|--|--|--|--|--|--|--|--|--|--|--|--|--|--|--|--|--|--|--|--|--|--|--|--|--|--|--|--|--|--|--|--|--|--|--|--|--|--|--|--|--|--|--|--|--|--|--|--|--|--|--|--|--|--|--|--|--|--|--|--|--|--|--|--|--|--|--|--|--|--|--|--|--|--|--|--|--|--|--|--|--|--|--|--|--|--|--|--|--|--|--|--|--|--|--|--|--|--|--|--|--|--|--|--|--|--|--|--|--|--|--|--|--|--|--|--|--|--|--|--|--|--|--|--|--|--|--|--|--|--|--|--|--|--|--|--|--|--|--|--|--|--|--|--|--|--|--|--|--|--|--|--|--|--|--|--|--|--|--|--|--|--|--|--|--|--|--|--|--|--|--|--|--|--|--|--|--|--|--|--|--|--|--|--|--|--|--|--|--|--|--|--|--|--|--|--|--|--|--|--|--|--|--|--|--|--|--|--|--|--|--|--|--|--|--|--|--|--|--|--|--|--|--|--|--|--|--|--|--|--|--|--|--|--|--|--|--|--|--|--|--|--|--|--|--|--|--|--|--|--|--|--|--|--|--|--|--|--|--|--|--|--|--|--|--|--|--|--|--|--|--|--|--|--|--|--|--|--|--|--|--|--|--|--|--|--|--|--|--|--|--|--|--|--|--|--|--|--|--|--|--|--|--|--|--|--|--|--|--|--|--|--|--|--|--|--|--|--|--|--|--|--|--|--|--|--|--|--|--|--|--|--|--|--|--|--|--|--|--|--|--|--|--|--|--|--|--|--|--|--|--|--|--|--|--|--|--|--|--|--|--|--|--|--|--|--|--|--|--|--|--|--|--|--|--|--|--|--|--|--|--|--|--|--|--|--|--|--|--|--|--|--|--|--|--|--|--|--|--|--|--|--|--|--|--|--|--|--|--|--|--|--|--|--|--|--|--|--|--|--|--|--|--|--|--|--|--|--|--|--|--|--|--|--|--|--|--|--|--|--|--|--|--|--|--|--|--|--|--|--|--|--|--|--|--|--|--|--|--|--|--|--|--|--|--|--|--|--|--|--|--|--|--|--|--|--|--|--|--|--|--|--|--|--|--|--|--|--|--|--|--|--|--|--|--|--|--|--|--|--|--|--|--|--|--|--|--|--|--|--|--|--|--|--|--|--|--|--|--|--|--|--|--|--|--|--|--|--|--|--|--|--|--|--|--|--|--|--|--|--|--|--|--|--|--|--|--|--|--|--|--|--|--|--|--|--|--|--|--|--|--|--|--|--|--|--|--|--|--|--|--|--|--|--|--|--|--|--|--|--|--|--|--|--|--|--|--|--|--|--|--|--|--|--|--|--|--|--|--|--|--|--|--|--|--|--|--|--|--|--|--|--|--|--|--|--|--|--|--|--|--|--|--|--|--|--|--|--|--|--|--|--|--|--|--|--|--|--|--|--|--|--|--|--|--|--|--|--|--|--|--|--|--|--|--|--|--|--|--|--|--|--|--|--|--|--|--|--|--|--|--|--|--|--|--|--|--|--|--|--|--|--|--|--|--|--|--|--|--|--|--|--|--|--|--|--|--|--|--|--|--|--|--|--|--|--|--|--|--|--|--|--|--|--|--|--|--|--|--|--|--|--|--|--|--|--|--|--|--|--|--|--|--|--|--|--|--|--|--|--|--|--|--|--|--|--|--|--|--|--|--|--|--|--|--|--|--|--|--|--|--|--|--|--|--|--|--|--|--|--|--|--|--|--|--|--|--|--|--|--|--|--|--|--|--|--|--|--|--|--|--|--|--|--|--|--|--|--|--|--|--|--|--|--|--|--|--|--|--|--|--|--|--|--|--|--|--|--|--|--|--|--|--|--|--|--|--|--|--|--|--|--|--|--|--|--|--|--|--|--|--|--|--|--|--|--|--|--|--|--|--|--|--|--|--|--|--|--|--|--|--|--|--|--|--|--|--|--|--|--|--|--|--|--|--|--|--|--|--|--|--|--|--|--|--|--|--|--|--|--|--|--|--|--|--|--|--|--|--|--|--|--|--|--|--|--|--|--|--|--|--|--|--|--|--|--|--|--|--|--|--|--|--|--|--|--|--|--|--|--|--|--|--|--|--|--|--|--|--|--|--|--|--|--|--|--|--|--|--|--|--|--|--|--|--|--|--|

|        |                       |                                                                                      |                                                                                      |                                  |       |                             |                             |                    |       |       |       |       |       |       |  |
|--------|-----------------------|--------------------------------------------------------------------------------------|--------------------------------------------------------------------------------------|----------------------------------|-------|-----------------------------|-----------------------------|--------------------|-------|-------|-------|-------|-------|-------|--|
|        | SY-<br>15062018<br>-7 | Leaf curling<br>infested with<br>whiteflies                                          | STV,<br>ToCV<br>TYLCV                                                                | -                                | -     |                             |                             |                    |       |       |       |       |       |       |  |
|        | SY-<br>15062018<br>-8 | Healthy sam-<br>ple                                                                  | Control                                                                              | -                                | -     |                             |                             |                    |       |       |       |       |       |       |  |
| Miyun  | MY-<br>15062018<br>-1 | Typical yel-<br>lowing, chlo-<br>rosis between<br>veins, and<br>having no<br>crinkle | TYLCV,<br>STV,<br>ToCV,<br>CMV                                                       |                                  |       | TY-<br>LCV,<br>STV          | TY-<br>LCV,<br>STV          |                    |       |       |       |       |       |       |  |
|        | MY-<br>15062018<br>-2 | Leaf (Green-<br>house 1)                                                             | Typical yel-<br>lowing, chlo-<br>rosis between<br>veins, and<br>having no<br>crinkle | TYLCV,<br>STV,<br>ToCV,<br>CMV   |       | TY-<br>LCV,<br>STV,<br>ToCV | TY-<br>LCV,<br>STV,<br>ToCV |                    |       |       |       |       |       |       |  |
|        | MY-<br>15062018<br>-3 |                                                                                      | Mild mosaic<br>symptoms                                                              | ToMV,<br>CMV,<br>PVY             |       | -                           | -                           |                    |       |       |       |       |       |       |  |
|        | MY-<br>15062018<br>-4 |                                                                                      | No obvious<br>symptoms<br>look healthy<br>sample                                     | Control                          |       | -                           | -                           |                    |       |       |       |       |       |       |  |
|        | MY-<br>15062018<br>-1 |                                                                                      | Mosaic, green<br>island, and<br>mild crinkle                                         | ToCV<br>CMV,<br>PVY              |       | -                           | -                           |                    |       |       |       |       |       |       |  |
|        | 40°22'36.9<br>5"N,    |                                                                                      | Leaf chlorosis                                                                       | TYLCV,<br>STV,<br>ToCV,<br>CMV   | 58.33 | 60.00                       | TY-<br>LCV                  | TY-<br>LCV         | 33.33 | 08.33 | 16.66 | 08.33 | 00.00 | 00.00 |  |
|        | 116°50'35.<br>04"E    |                                                                                      | between veins<br>and having no<br>crinkle                                            | TYLCV,<br>STV,<br>ToCV,<br>CMV   |       |                             |                             |                    |       |       |       |       |       |       |  |
|        | MY-<br>15062018<br>-3 |                                                                                      | Leaf yellow-<br>ing, chlorosis,<br>and having no<br>crinkle                          | TYLCV,<br>STV,<br>ToCV,<br>CMV   |       |                             | STV                         | STV                |       |       |       |       |       |       |  |
|        | MY-<br>15062018<br>-4 | Leaf (Green-<br>house 2/3)                                                           | Leaf yellow-<br>ing, chlorosis,<br>and having no<br>crinkle                          | TYLCV,<br>STV,<br>ToCV,<br>CMV   |       |                             | -                           | -                  |       |       |       |       |       |       |  |
|        | MY-<br>15062018<br>-5 |                                                                                      | Leaf yellow-<br>ing, chlorosis,<br>and having no<br>crinkle                          | TYLCV,<br>STV,<br>ToCV,<br>CMV   |       |                             | TY-<br>LCV,<br>STV          | TY-<br>LCV,<br>STV |       |       |       |       |       |       |  |
|        | MY-<br>15062018<br>-6 |                                                                                      | Leaf curling<br>and crinkling                                                        | ToMV,<br>ToCV,<br>TYLCV          |       |                             | TY-<br>LCV                  | TY-<br>LCV         |       |       |       |       |       |       |  |
|        | MY-<br>15062018<br>-7 |                                                                                      | Leaf yellow-<br>ing, crinkling,<br>and defor-<br>mation                              | STV,<br>ToMV,<br>ToCV,<br>TYLCV  |       |                             | -                           | -                  |       |       |       |       |       |       |  |
|        | MY-<br>15062018<br>-8 |                                                                                      | Leaf crinkling<br>and defor-<br>mation                                               | ToMV,<br>ToCV,<br>TYLCV          |       |                             | TY-<br>LCV                  | TY-<br>LCV         |       |       |       |       |       |       |  |
| Pinggu | PG-<br>08112018<br>-1 | Leaf (Green-<br>house 1)                                                             | Leaf crinkling<br>and defor-<br>mation with<br>whiteflies in-<br>festations          | TYLCV,<br>ToCV,<br>TICV,<br>TSWV | 57.14 | 60.00                       | -                           | -                  | 35.71 | 14.28 | 14.28 |       | 07.14 | 00.00 |  |
|        | PG-<br>08112018<br>-2 |                                                                                      | Leaf yellow-<br>ing and fruit<br>deformation                                         | STV,<br>TSWV                     |       |                             | STV                         | STV                |       |       |       |       |       |       |  |
|        | PG-<br>08112018<br>-3 |                                                                                      | Leaf yellow-<br>ing and fruit<br>deformation                                         | STV,<br>TSWV                     |       |                             | -                           | -                  |       |       |       |       |       |       |  |

[illegible]

[illegible]



|                                                                                                                                                                                                                                                                                                                                                                                                                    |                 |                              |                                                |                                                      |                                                                                                  |                                                 |  |                                                                    |   |  |  |  |  |  |
|--------------------------------------------------------------------------------------------------------------------------------------------------------------------------------------------------------------------------------------------------------------------------------------------------------------------------------------------------------------------------------------------------------------------|-----------------|------------------------------|------------------------------------------------|------------------------------------------------------|--------------------------------------------------------------------------------------------------|-------------------------------------------------|--|--------------------------------------------------------------------|---|--|--|--|--|--|
|                                                                                                                                                                                                                                                                                                                                                                                                                    |                 |                              | CMV,<br>PVY                                    |                                                      |                                                                                                  |                                                 |  |                                                                    |   |  |  |  |  |  |
|                                                                                                                                                                                                                                                                                                                                                                                                                    |                 |                              | TYLCV,<br>STV,<br>ToCV,<br>CMV<br>ToMV,<br>PVY |                                                      |                                                                                                  |                                                 |  |                                                                    |   |  |  |  |  |  |
|                                                                                                                                                                                                                                                                                                                                                                                                                    |                 |                              | YQ-<br>27062019<br>-7                          | Leaf<br>(Green-<br>house 3)                          | No symptoms<br>(health sam-<br>ple)                                                              |                                                 |  | -                                                                  | - |  |  |  |  |  |
| <u>Beijing, China</u>                                                                                                                                                                                                                                                                                                                                                                                              |                 |                              |                                                |                                                      |                                                                                                  |                                                 |  |                                                                    |   |  |  |  |  |  |
| [Total harvested samples= 109, Negative= 45 samples, STV infection= 21 samples, TYLCV infection= 13 samples, TSWV infection= 1 sample, STV+TYLCV infection= 14 samples, STV+ToCV infection= 1 sample, STV+TYLCV+ToCV infection= 8 samples, STV+TYLCV+ToCV+TSWV infection= 2 samples, STV+TYLCV+ToCV+TSWV+ToMV infection= 2 samples, STV+TYLCV+ToCV+ToMV infection= 1 sample, TYLCV+ STV+ ToMV infection= 1 sample] |                 |                              |                                                |                                                      |                                                                                                  |                                                 |  |                                                                    |   |  |  |  |  |  |
| *Samples, FS-08122017-8 and TZ-12042018-3, were subjected to the Next generation sequencing technology and STV was detected with multiple viruses (STV, TSWV, TYLCV, ToCV, ToMV, and TICV).                                                                                                                                                                                                                        |                 |                              |                                                |                                                      |                                                                                                  |                                                 |  |                                                                    |   |  |  |  |  |  |
| 19.26 12.84 07.33 01.83 01.83                                                                                                                                                                                                                                                                                                                                                                                      |                 |                              |                                                |                                                      |                                                                                                  |                                                 |  |                                                                    |   |  |  |  |  |  |
| <u>Rate of infections</u>                                                                                                                                                                                                                                                                                                                                                                                          |                 |                              |                                                |                                                      |                                                                                                  |                                                 |  |                                                                    |   |  |  |  |  |  |
| Negative= 41.28 %                                                                                                                                                                                                                                                                                                                                                                                                  |                 |                              |                                                |                                                      |                                                                                                  |                                                 |  |                                                                    |   |  |  |  |  |  |
| STV single infection= 19.26 %                                                                                                                                                                                                                                                                                                                                                                                      |                 |                              |                                                |                                                      |                                                                                                  |                                                 |  |                                                                    |   |  |  |  |  |  |
| STV mixed infection= 26.60%                                                                                                                                                                                                                                                                                                                                                                                        |                 |                              |                                                |                                                      |                                                                                                  |                                                 |  |                                                                    |   |  |  |  |  |  |
| STV+TSWV+TYLCV+ToCV+ToMV+TICV= 01.83%                                                                                                                                                                                                                                                                                                                                                                              |                 |                              |                                                |                                                      |                                                                                                  |                                                 |  |                                                                    |   |  |  |  |  |  |
|                                                                                                                                                                                                                                                                                                                                                                                                                    |                 |                              | FSD-<br>13022019<br>-Nagina                    | Seed<br>(ARRI,<br>Green-<br>house 1)                 | Pronounce<br>chlorotic, yel-<br>lowing, and<br>leaf curling                                      | TYLCV,<br>STV                                   |  | STV, STV,<br>TY- TY-<br>LCV LCV                                    |   |  |  |  |  |  |
|                                                                                                                                                                                                                                                                                                                                                                                                                    |                 |                              | FSD-<br>13022019<br>-Nagina                    |                                                      | Pronounce<br>chlorotic, yel-<br>lowing and<br>leaf curling                                       | STV,<br>TYLCV                                   |  | TY- TY-<br>LCV LCV                                                 |   |  |  |  |  |  |
|                                                                                                                                                                                                                                                                                                                                                                                                                    |                 |                              | FSD-<br>13022019<br>-Rio<br>Grande             | Seed/<br>Leaf<br>(ARRI,<br>Green-<br>house 2)        | Emerging<br>leaves becom-<br>ing yellow,<br>mild mosaic<br>and crinkle                           | STV,<br>TYLCV,<br>ToCV,<br>ToMV,<br>CMV         |  | STV,<br>STV, ToCV,<br>ToCV, TY-<br>TY- LCV,<br>LCV, ToMV<br>ToMV * |   |  |  |  |  |  |
|                                                                                                                                                                                                                                                                                                                                                                                                                    |                 |                              | FSD-<br>13022019<br>-Thorgal                   | Seed/<br>Leaf<br>(ARRI,<br>East<br>green-<br>house)  | Leaves are be-<br>coming<br>smaller and<br>darker in-<br>fested with<br>whiteflies and<br>mites. | TYLCV,<br>ToCV,<br>ToMV,<br>CMV                 |  | - -                                                                |   |  |  |  |  |  |
| Pun-<br>jab,<br>Paki-<br>stan                                                                                                                                                                                                                                                                                                                                                                                      | Faisala-<br>bad | 31°27'1.32"N,<br>73°8'5.86"E | FSD-<br>13022019<br>-Morgal                    |                                                      | Typical chlo-<br>rosis, yellow-<br>ing and leaf<br>curling                                       | STV,<br>TYLCV,<br>ToCV,<br>ToMV,<br>CMV,<br>PVY |  | TY- TY-<br>LCV LCV                                                 |   |  |  |  |  |  |
|                                                                                                                                                                                                                                                                                                                                                                                                                    |                 |                              | FSD-<br>13022019<br>-SBS-292                   | Seed<br>(PPRI,<br>South<br>green-<br>house)          | Typical chlo-<br>rosis, yellow-<br>ing and leaf<br>curling                                       | STV,<br>TYLCV,                                  |  | STV, STV,<br>TY- TY-<br>LCV LCV                                    |   |  |  |  |  |  |
|                                                                                                                                                                                                                                                                                                                                                                                                                    |                 |                              | FSD-<br>13022019<br>-GSL-<br>198               | Seed/<br>Leaf<br>(PPRI,<br>South<br>green-<br>house) | Leaf yellow-<br>ing, mild mo-<br>saic mottling                                                   | STV,<br>TYLCV,<br>ToCV,<br>ToMV,<br>CMV,<br>PVY |  | STV, STV,<br>TY- TY-<br>LCV LCV,<br>ToCV ToCV                      |   |  |  |  |  |  |
|                                                                                                                                                                                                                                                                                                                                                                                                                    |                 |                              | FSD-<br>13022019                               |                                                      | Leaf yellow-<br>ing, mild mo-<br>saic mottling                                                   | STV,<br>TYLCV,<br>ToCV,                         |  | STV, STV,<br>TY- TY-<br>LCV LCV                                    |   |  |  |  |  |  |

[illegible]

[illegible]

| emerging leaves          |                                   |                                                                               |                                  |                       |                       |
|--------------------------|-----------------------------------|-------------------------------------------------------------------------------|----------------------------------|-----------------------|-----------------------|
| LHR-09062020-Rutgers     |                                   |                                                                               | STV, TYLCV                       | -                     | -                     |
| LHR-09062020-Hybrid      | Seed (South-ern                   | Directly ob-<br>tained from                                                   | STV, TYLCV                       | STV, TY-<br>LCV       | STV, TY-<br>LCV       |
| LHR-09062020-Early stone | Army vegetable Farm)              | the seed source                                                               | STV, TYLCV                       | STV                   | STV                   |
| LHR-09062020-Rio Grande  |                                   |                                                                               | STV, TYLCV                       | TY-<br>LCV            | TY-<br>LCV            |
| LHR-11062020-1           |                                   | Leaf curling and deformation with severe infestation of white-flies and mites | ToCV, ToMV, TYLCV, PVY, CMV      | TY-<br>LCV            | TY-<br>LCV            |
| LHR-11062020-2           | Leaf (Western vegetable garden 1) | Leaf curling and deformation with severe infestation of white-flies and mites | STV, ToCV, ToMV, TYLCV, PVY, CMV | -                     | -                     |
| LHR-11062020-3           |                                   | Plant stunting, leaf curling and yellowing, and reduced fruit size            | STV, ToCV, ToMV, TYLCV           | STV                   | STV                   |
| LHR-11062020-4           |                                   | No obvious symptoms                                                           | STV                              | -                     | -                     |
| LHR-11062020-5           | Leaf (Western vegetable garden 2) | Typical yellowing, leaf curling, crinkling, and fruit deformations            | TYLCV, STV, ToMV, CMV, ToCV      | TY-<br>LCV, STV, ToCV | TY-<br>LCV, STV, ToCV |

Punjab, Pakistan

[Total harvested samples= 44, Negative= 18 samples, STV infection= 5 samples, TYLCV infection= 6 samples, STV+TYLCV infection= 7 samples, STV+TYLCV+ToCV infection= 6 samples, STV+TYLCV+ToCV+ToMV infection= 2 sample]

\* FSD-13022019-Rio Grande sample was also subjected to the Next generation sequencing technology to identify the STV virus from Pakistan.

11.36 15.90 13.63 00.00 00.00

#### Rate of infections

Negative samples= 40.90%

STV single infection= 11.36%

STV mixed infection= 34.09%

STV+TYLCV+ToCV+ToMV infection= 04.54%

**Abbreviations:** AARI, Ayub agricultural research institute; CMV, cucumber mosaic cucumovirus; GPS, global positioning system; PPRI, plant protection research institute; PVY, Potato potyvirus Y; STV, southern tomato amalgavirus; ToCV, tomato chlorosis crinivirus; TICV, tomato infectious chlorosis crinivirus; ToMV, tomato mosaic tobamovirus, TSWV, tomato spotted wilt orthotospovirus; TYLCV, tomato yellow leaf curl begomovirus; ToYSD, tomato yellow stunt disease; VRI, vegetable research institute. <sup>1</sup> The rate of ToYSD infection (prevalence and incidence) was calculated by the following equations: <sup>a</sup>ToYSD prevalence =  $\frac{x}{y} \times 100$ , where X is the number of sample production localities (greenhouses/fields) with visible ToYSD symptoms; Y is the total number of sample production localities observed in a region [26]. <sup>b</sup> ToYSD incidence =  $\frac{(N-n)}{N} \times 100$ , where N is the total

number of samples under observation, and n is the total number of healthy samples without ToYSD symptoms and viral infections [26].

**Table S2.** Primer sequences used in this study for the detection of different plant viruses and amplification as well as molecular cloning of STV.

| Primers used for the detection of multiple viruses                         |                                                            |                                                                                                          |                 |                       |                                                                                                                                                   |            |
|----------------------------------------------------------------------------|------------------------------------------------------------|----------------------------------------------------------------------------------------------------------|-----------------|-----------------------|---------------------------------------------------------------------------------------------------------------------------------------------------|------------|
| Primer name                                                                | Detection of virus                                         | Primer Sequence (5'-3')                                                                                  | Amplicon length | Annealing temperature | Remarks                                                                                                                                           | Reference  |
| STV-F<br>STV-R                                                             | Southern tomato amalgavirus                                | CGTTATCTTAGGCGTCAGCT<br>GGAGTTTGATTGCATCAGCG                                                             | 448bp           | 53°C                  | A fragment covering a conserved region of p42 and RdRp at the position of ribosomal frame shifting.                                               | [8]        |
| ToCV-16-F<br>ToCV-481-R                                                    | Tomato chlorosis crinivirus                                | GGTTTGGATTTTGGTACTA-CATTCACT<br>AAACTGCCTG-CATGAAAAGTCTC                                                 | 466bp           | 54 °C                 | An amplicon covering Heat shock protein 70 homolog (HSP70h).                                                                                      | [28,34]    |
| TICV-32-F<br>TICV-532-F                                                    | Tomato infectious chlorosis crinivirus                     | TCAGTGCCTACGTTAATGGG<br>CACAGTATACAGCAGCGGCA                                                             | 501bp           | 55 °C                 | A fragment corresponding to part of the coding sequence of the HSP70h, excluding the phosphate 1 and 2 motif.                                     | [31]       |
| ToMV_527-F<br>ToMV_843-F                                                   | Tomato mosaic tobamovirus                                  | CGAGAGGGGCAACAAACAT<br>ACCTGTCTCCATCTCTTTGG<br>TAATATTACCKGWKGVCSC                                       | 318bp           | 56 °C                 | An amplicon covering a portion within the replicase gene.                                                                                         | [29]       |
| TYLCV/IR-F<br>TYLCV/AV1-R                                                  | Tomato yellow leaf curl begomovirus                        | TGGACYTTRCAWGG-BCCTTCACA<br>(B=C, T or G, K=G or T, R=A or G, S=C or G, V=A, C or G, W=A or T, Y=C or T) | ~500bp          | 54 °C                 | Adopted from universal degenerate primers PA and PB corresponding to portion of the intergenic region (IR) and the AV1 gene of the DNA-A.         | [30,32,33] |
| Tospovirus_RdRp-F<br>Tospovirus_RdRp-R                                     | Tomato spotted wilt orthotospovirus                        | CCTTTAACAGT(A/T/G)GAAACAT<br>CAT(A/T/G)GC(A/G)CAAGA(A/G)TG(A/G)TA(A/G)ACAGA                              | ~800bp          | 50 °C                 | Adopted from degenerate primers gL3637 and gL4435c, covering a part of RdRP from L-RNA of orthotospovirus.                                        | [27]       |
| Primers designed for the amplification and molecular cloning of STV genome |                                                            |                                                                                                          |                 |                       |                                                                                                                                                   |            |
| Primer name                                                                | Amplification                                              | Primer Sequence (5'-3')                                                                                  | Amplicon length | Annealing temperature | Remarks                                                                                                                                           |            |
| STV-F1<br>STV-R1                                                           | Amplification of Southern tomato amalgavirus insert part A | ggaagttcatttcattggagaggGA-TAAATTTAGTAAGCTACCTAGC<br>CTTGATCTCTCCGCAG-TATATTA                             | 1880bp          | 62 °C                 | Overlapping pairs of primers, homologous to the vector plasmid (pCB301-2-HDV), were designed for the amplification of STV genome.                 |            |
| STV-F2<br>STV-R2                                                           | Amplification of Southern tomato amalgavirus insert part B | GTGAGGCGGTTAA-GAAGTTTACAG<br>gaggtggagatgccatgccaccGAA-GACGCGCTACTCTAATAACAG                             | 1681bp          | 65 °C                 |                                                                                                                                                   |            |
| pCB301 backbone-F<br>pCB301 backbone-R                                     | Amplification of plasmid pCB301-2μ-HDV                     | CTGTTATTAGAG-TAGCGCGTCTTCgggtcggcatggcatctccactc<br>GCTAGGTAGCTTACTA-AATTTATCctctccaaatgaaatgaacttc      | 7838bp          | 66 °C                 | A pair of primers, homologous to STV, were designed to linearize the plasmid (pCB301-2μ-HDV) between the CaMV 35S promoter and the HDRz sequence. |            |

**Table S3.** STV reference isolates used in this study with a detailed description, including accession number, name of isolate, sequence length, country, and host.

| No. | Accession | Isolate description              | Sequence length | Country | Host                        |
|-----|-----------|----------------------------------|-----------------|---------|-----------------------------|
| 1   | OK309707  | STV, isolate Turkey_Antalya_1    | 3315            | Turkey  | <i>Solanum lycopersicum</i> |
| 2   | OK309708  | STV, isolate Turkey_Antalya_6    | 3315            | Turkey  | <i>S. lycopersicum</i>      |
| 3   | OK309709  | STV, isolate Turkey_Balikesir_2  | 3315            | Turkey  | <i>S. lycopersicum</i>      |
| 4   | OK309710  | STV, isolate Turkey_Balikesir_5  | 3315            | Turkey  | <i>S. lycopersicum</i>      |
| 5   | OK309711  | STV, isolate Turkey_Canakkale_42 | 3315            | Turkey  | <i>S. lycopersicum</i>      |
| 6   | OK309712  | STV, isolate Turkey_Manisa_12    | 3315            | Turkey  | <i>S. lycopersicum</i>      |
| 7   | OK309713  | STV, isolate Turkey_Manisa_8     | 3315            | Turkey  | <i>S. lycopersicum</i>      |

|    |              |                                          |      |                |                        |
|----|--------------|------------------------------------------|------|----------------|------------------------|
| 8  | OK309714     | STV, isolate Turkey_Canakkale_16         | 3315 | Turkey         | <i>S. lycopersicum</i> |
| 9  | OK309715     | STV, isolate Turkey_Edirne_32            | 3315 | Turkey         | <i>S. lycopersicum</i> |
| 10 | OK309716     | STV, isolate Turkey_Tekirdag_29          | 3315 | Turkey         | <i>S. lycopersicum</i> |
| 11 | OK309717     | STV, isolate Turkey_Izmir_60             | 3315 | Turkey         | <i>S. lycopersicum</i> |
| 12 | OK309718     | STV, isolate Turkey_Izmir_63             | 3315 | Turkey         | <i>S. lycopersicum</i> |
| 13 | OK309719     | STV, isolate Turkey_Izmir_65             | 3315 | Turkey         | <i>S. lycopersicum</i> |
| 14 | OK309720     | STV, isolate Turkey_Bursa_52             | 3315 | Turkey         | <i>S. lycopersicum</i> |
| 15 | OK309721     | STV, isolate Turkey_Bursa_56             | 3315 | Turkey         | <i>S. lycopersicum</i> |
| 16 | LC429302     | STV, M82 genomic RNA                     | 3376 | Japan          | <i>S. lycopersicum</i> |
| 17 | MW26606<br>2 | STV, isolate 21807453                    | 3393 | United Kingdom | <i>S. lycopersicum</i> |
| 18 | MW01241<br>3 | STV, isolate DDT                         | 3398 | Vietnam        | <i>S. lycopersicum</i> |
| 19 | MW01241<br>2 | STV, isolate DCT                         | 3411 | Vietnam        | <i>S. lycopersicum</i> |
| 20 | MK61025<br>7 | STV, isolate Canada                      | 3414 | Canada         | <i>S. lycopersicum</i> |
| 21 | MW01241<br>1 | STV, isolate DTT                         | 3415 | Vietnam        | <i>S. lycopersicum</i> |
| 22 | MG80838<br>3 | STV, isolate STV-MG                      | 3416 | Brazil         | <i>S. lycopersicum</i> |
| 23 | MW01241<br>0 | STV, isolate GLT                         | 3425 | Vietnam        | <i>S. lycopersicum</i> |
| 24 | KJ174690     | STV, isolate GCN06                       | 3426 | Spain          | <i>S. lycopersicum</i> |
| 25 | KT438549     | STV, isolate CN-12                       | 3430 | China          | <i>S. lycopersicum</i> |
| 26 | EF442780     | STV, isolate Mexico-1                    | 3433 | Mexico         | <i>S. lycopersicum</i> |
| 27 | EU413670     | STV, isolate MS-7                        | 3433 | USA            | N/A                    |
| 28 | KT634055     | STV, isolate BD-13                       | 3433 | Bangladesh     | <i>S. lycopersicum</i> |
| 29 | KT852573     | STV, isolate NC12-03-08                  | 3433 | USA            | <i>S. lycopersicum</i> |
| 30 | KX949574     | STV, isolate Florida                     | 3433 | USA            | <i>S. lycopersicum</i> |
| 31 | KY228384     | STV, isolate XJ-p                        | 3433 | China          | <i>S. lycopersicum</i> |
| 32 | KY810783     | STV, strain FERA_160205                  | 3433 | United Kingdom | <i>S. lycopersicum</i> |
| 33 | LC270272     | STV, genomic RNA, isolate: Gimcheon      | 3433 | South Korea    | <i>S. lycopersicum</i> |
| 34 | LC487710     | STV, Thailand genomic RNA                | 3433 | Thailand       | <i>Capsicum annuum</i> |
| 35 | MF422617     | STV, isolate CH_bpo161                   | 3433 | Switzerland    | <i>S. lycopersicum</i> |
| 36 | MF422618     | STV, isolate CH_bpo163                   | 3433 | Switzerland    | <i>S. lycopersicum</i> |
| 37 | MN09571<br>6 | STV, isolate Antioquia/May5              | 3433 | Colombia       | <i>S. lycopersicum</i> |
| 38 | MT051992     | STV, isolate STV_Panama                  | 3433 | Panama         | <i>S. lycopersicum</i> |
| 39 | MT066231     | STV, isolate Pk                          | 3437 | Pakistan       | <i>S. lycopersicum</i> |
| 40 | MT269808     | STV, isolate 232-11                      | 3433 | Serbia         | <i>S. lycopersicum</i> |
| 41 | MT269809     | STV, isolate 323-12                      | 3433 | Serbia         | <i>S. lycopersicum</i> |
| 42 | MW52086<br>0 | STV, isolate RE-RE1375-Grand Tampon-2018 | 3433 | Reunion        | <i>S. lycopersicum</i> |
| 43 | OP548652     | STV, isolate Tongzhou, Beijing           | 3437 | China          | <i>S. lycopersicum</i> |
| 44 | OP548653     | STV, Isolate Fangshan, Beijing           | 3437 | China          | <i>S. lycopersicum</i> |

## Reference:

8. Sabanadzovic, S.; Valverde, R.A.; Brown, J.K.; Martin, R.R.; Tzanetakis, I.E. Southern tomato virus: The link between the families Totiviridae and Partitiviridae. *Virus Res.* 2009, 140, 130–137.
26. Saokham, K.; Hemniam, N.; Roekwan, S.; Hunsawattanukul, S.; Thawinampan, J.; Siriwan, W. Survey and molecular detection of Sri Lankan cassava mosaic virus in Thailand. *PLoS ONE* 2021, 16, e0252846.
27. Chu, F.H.; Chao, C.H.; Chung, M.H.; Chen, C.C.; Yeh, S.D. Completion of the genome sequence of Watermelon silver mottle virus and utilization of degenerate primers for detecting tospoviruses in five serogroups. *Phytopathology* 2001, 91, 361–368.
28. Dovas, C.; Katis, N.; Avgelis, A. Multiplex detection of criniviruses associated with epidemics of a yellowing disease of tomato in Greece. *Plant Dis.* 2002, 86, 1345–1349.
29. Kumar, S.; Udaya Shankar, A.; Nayaka, S.; Lund, O.; Prakash, H. Detection of Tobacco mosaic virus and Tomato mosaic virus in pepper and tomato by multiplex RT-PCR. *Lett. Appl. Microbiol.* 2011, 53, 359–363.
30. Li, Z.; Zhou, X.; Zhang, X.; Xie, Y. Molecular characterization of tomato-infecting begomoviruses in Yunnan, China. *Arch. Virol.* 2004, 149, 1721–1732.

31. Vaira, A.; Accotto, G.; Vecchiati, M.; Bragaloni, M. Tomato infectious chlorosis virus causes leaf yellowing and reddening of tomato in Italy. *Phytoparasitica* 2002, 30, 290–294.
32. Xie, Y.; Jiao, X.; Zhou, X.; Liu, H.; Ni, Y.; Wu, J. Highly sensitive serological methods for detecting tomato yellow leaf curl virus in tomato plants and whiteflies. *Virol. J.* 2013, 10, 142.
33. Xie, Y.; Zhou, X.; Zhang, Z.; Qi, Y. Tobacco curly shoot virus isolated in Yunnan is a distinct species of Begomovirus. *Chin. Sci. Bull.* 2002, 47, 199–201.
34. Zhao, R.; Wang, R.; Wang, N.; Fan, Z.; Zhou, T.; Shi, Y.; Chai, M. First report of Tomato chlorosis virus in China. *Plant Dis.* 2013, 97, 1123–1123.
